# Supplementary material for: A systems immunology study comparing innate and adaptive immune responses in adults to COVID-19 mRNA (BNT162b2/mRNA-1273) and adenovirus vectored vaccines (ChAdOx1-S) after the first, second and third doses
Source: bioRxiv or medRxiv preprint supplement (doi:10.1101/2022.09.22.22280180), 2022-09-23

# Immune cell counts

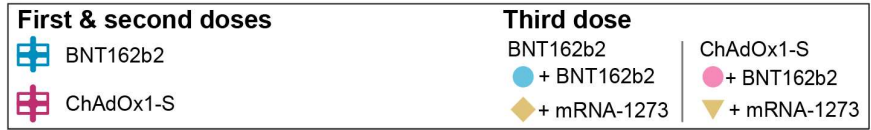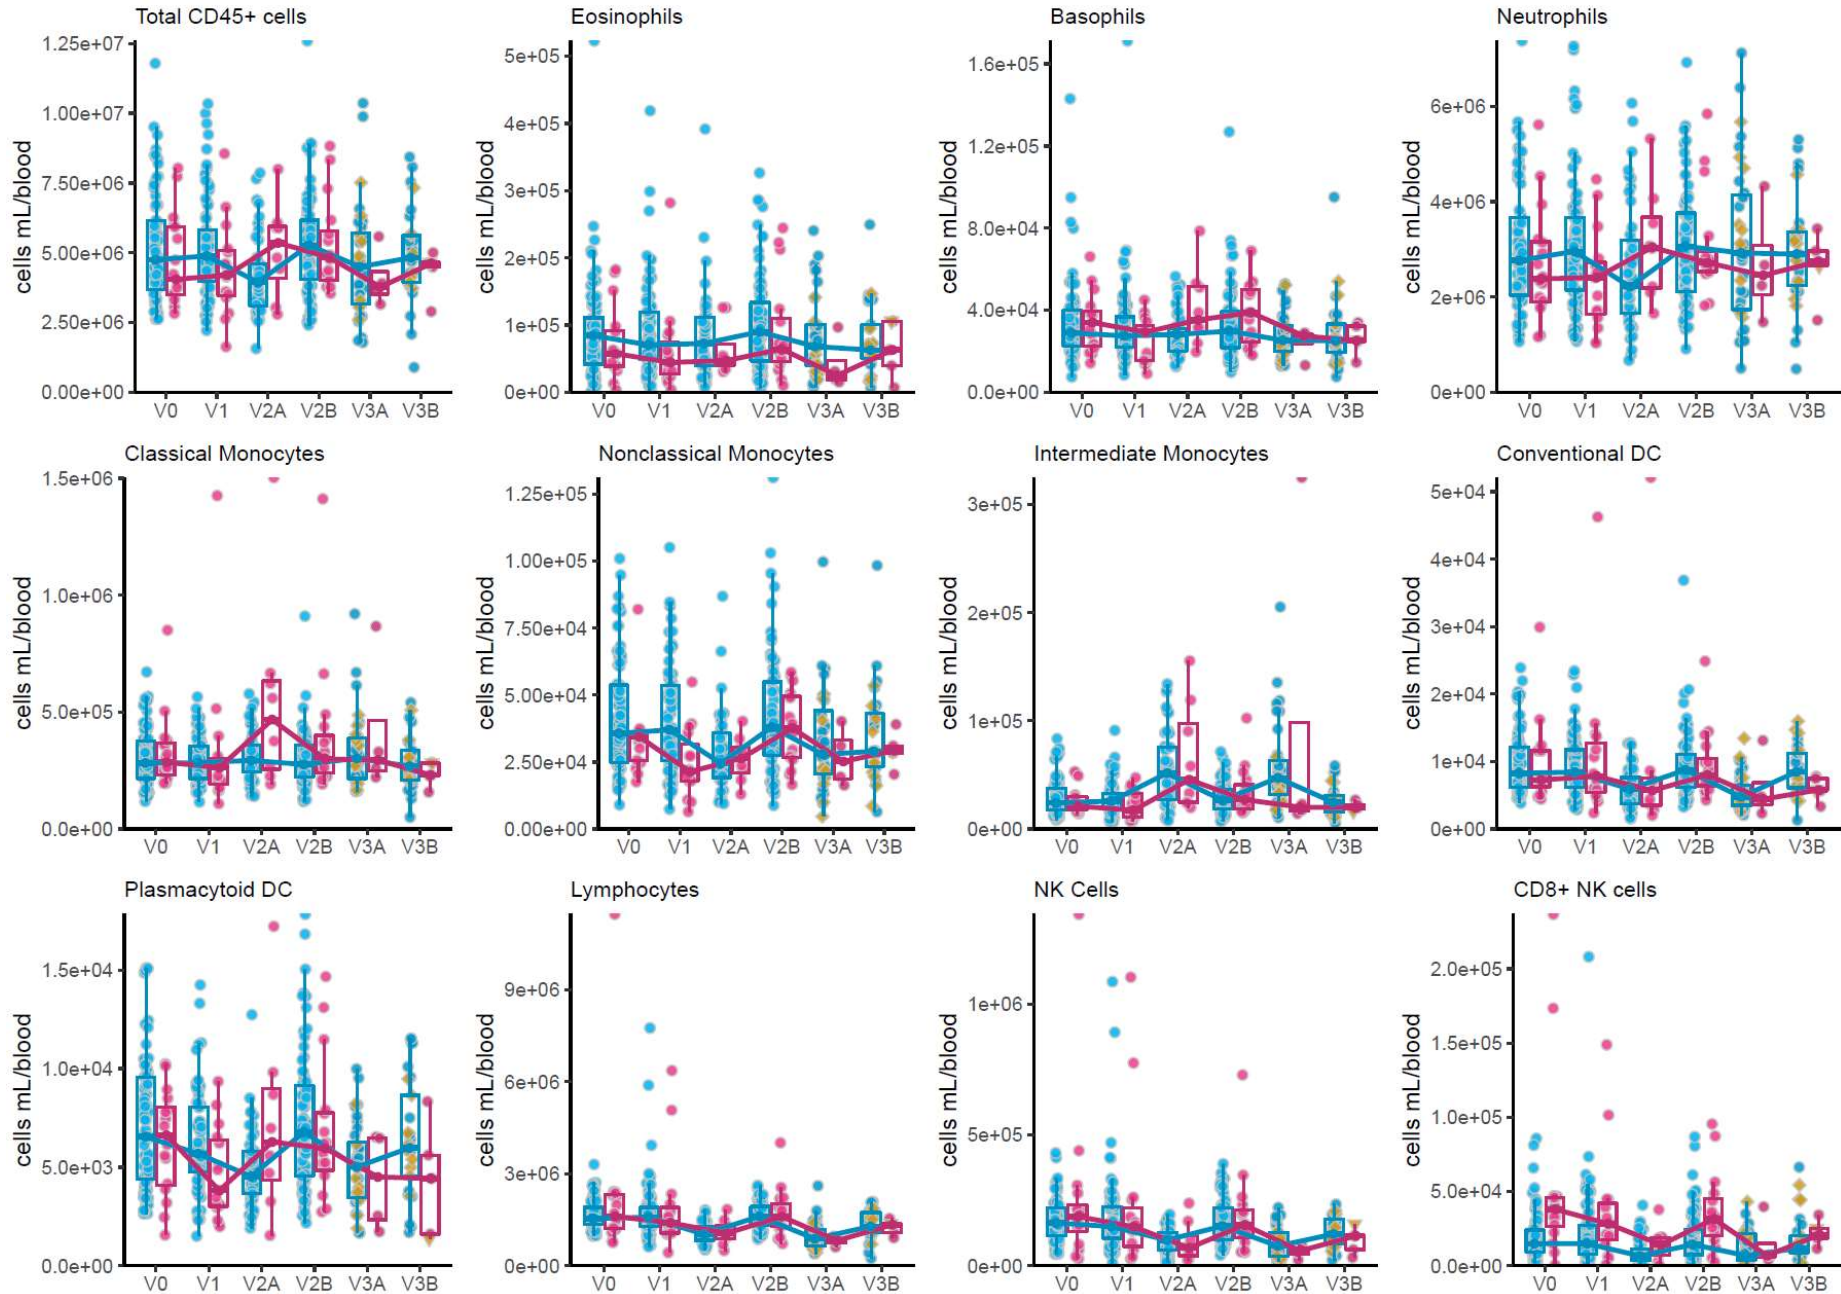

# Immune cell counts

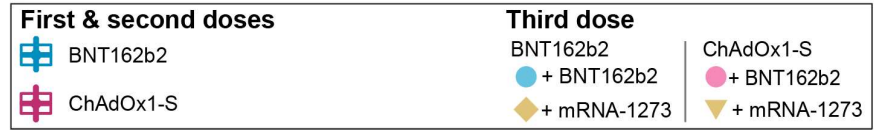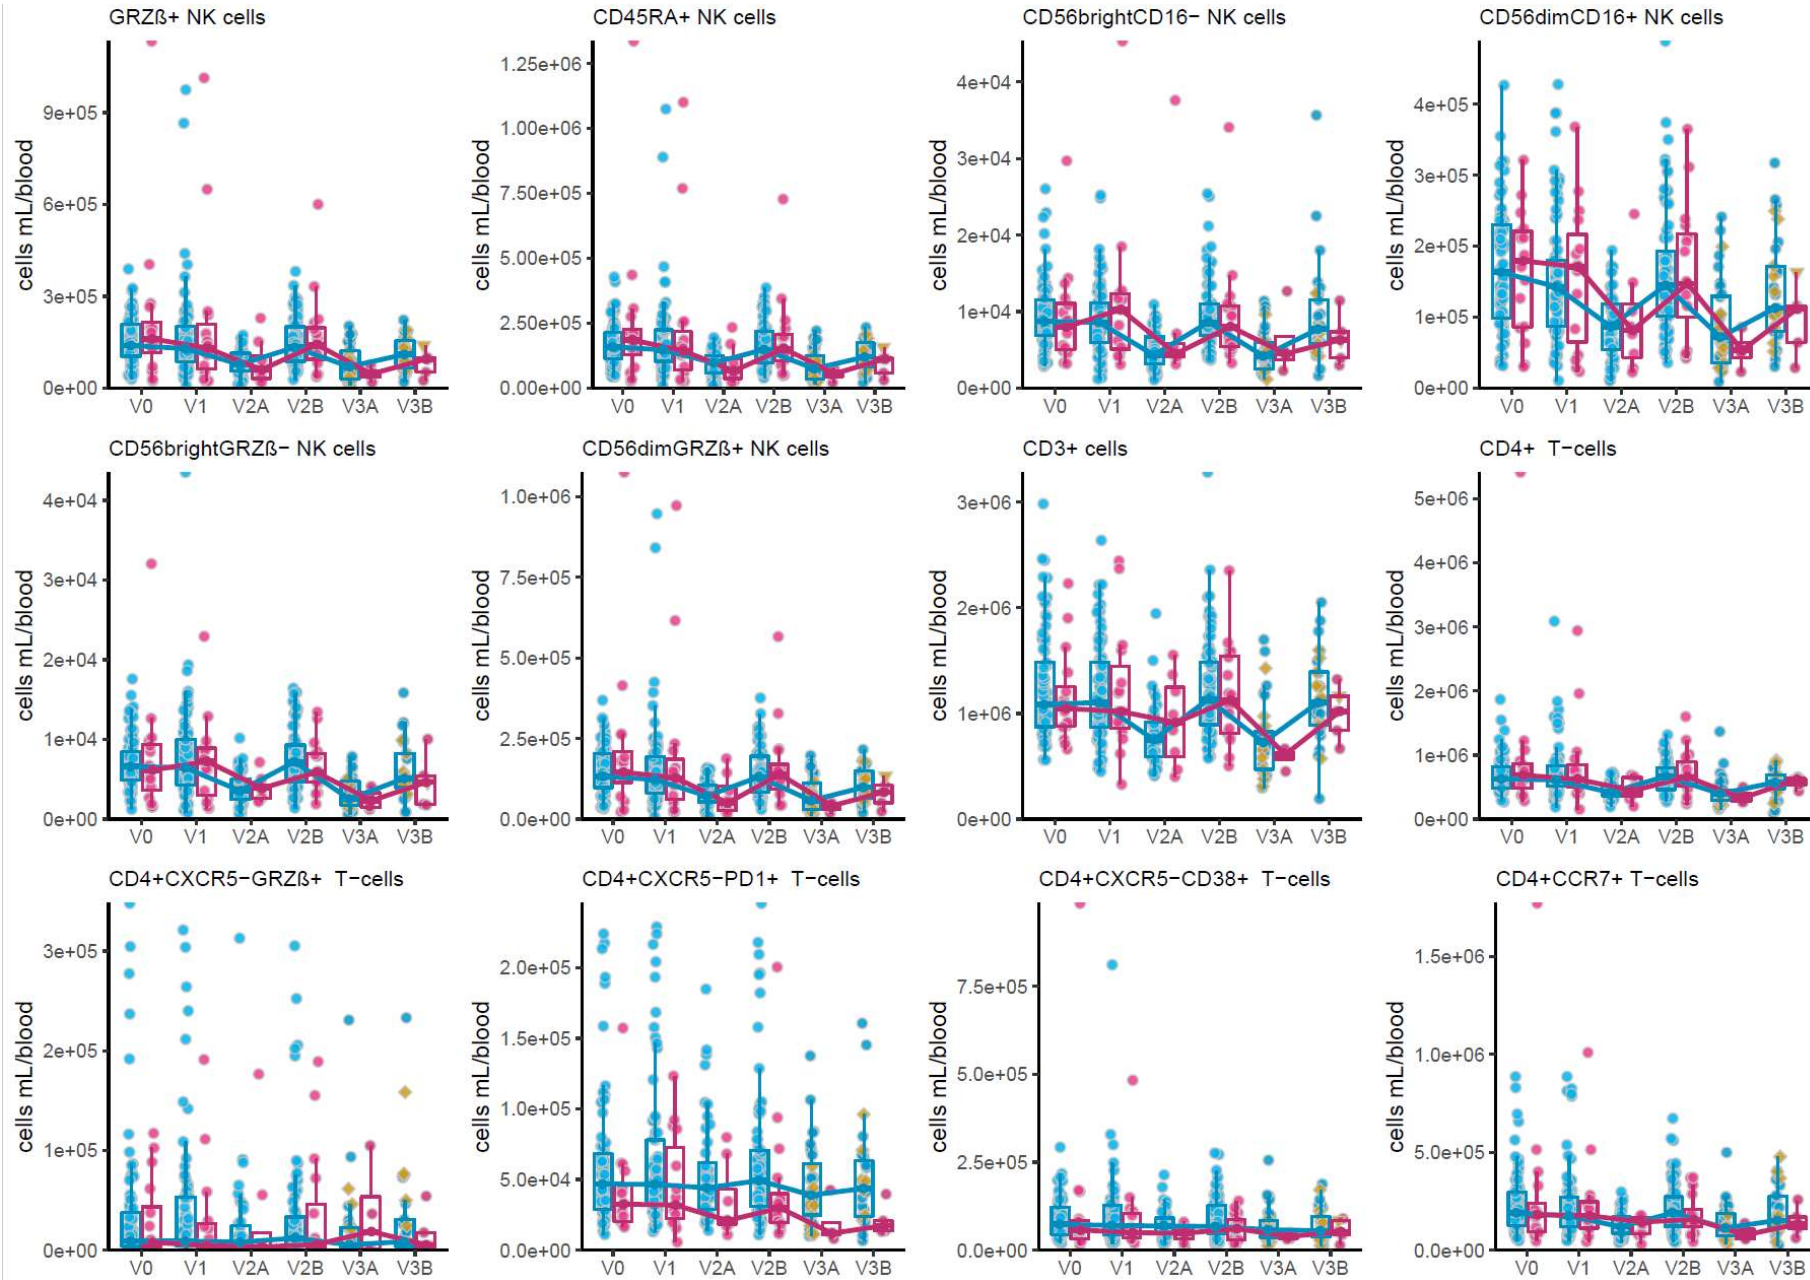



# Immune cell counts

**First & second doses**

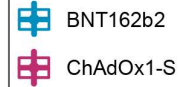

**Third dose**

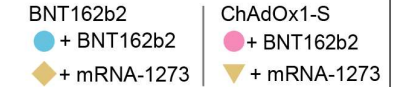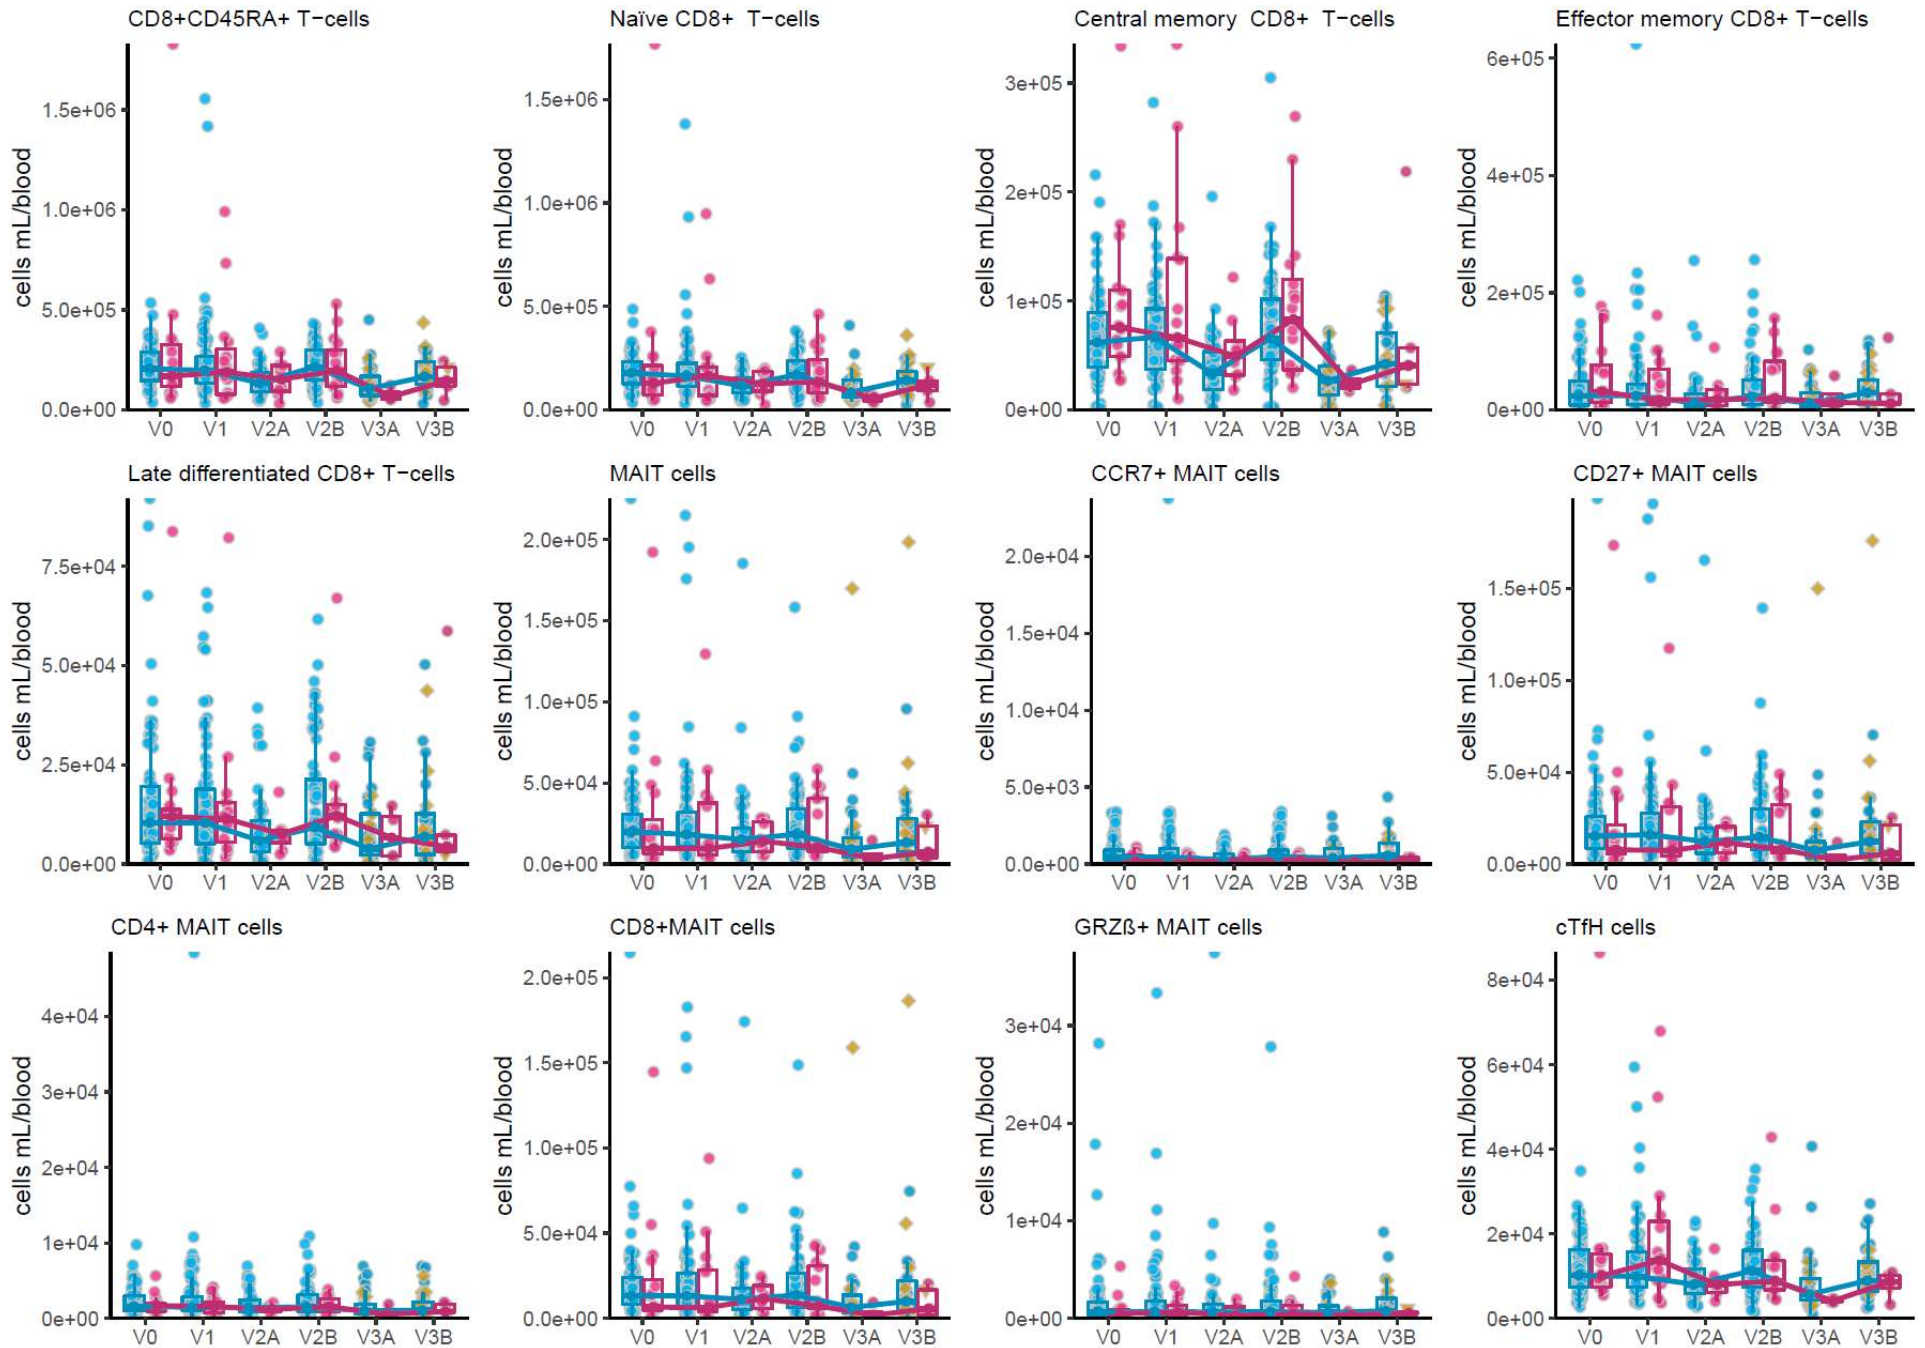

# Immune cell counts

## First & second doses

- BNT162b2
- ChAdOx1-S

## Third dose

- + BNT162b2
- + BNT162b2
- ◆ + mRNA-1273
- ChAdOx1-S
- + BNT162b2
- ▼ + mRNA-1273

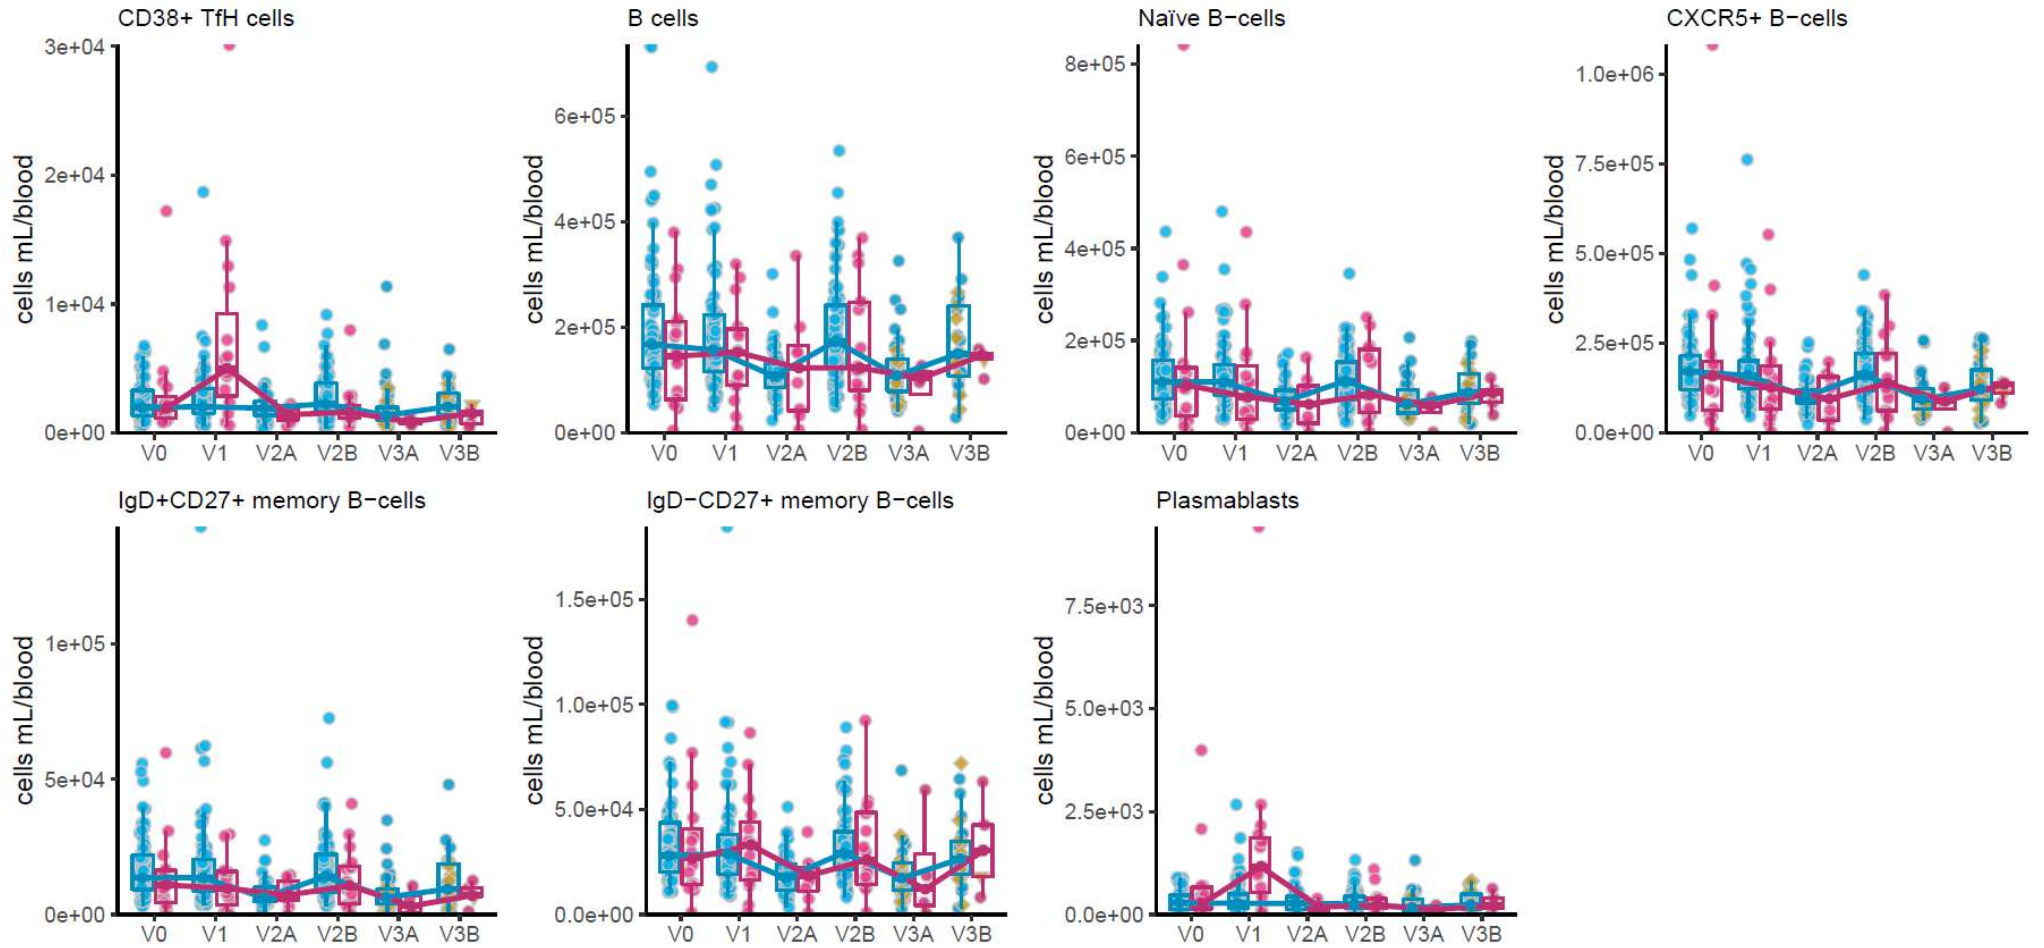



# Immune cell (% of parent)

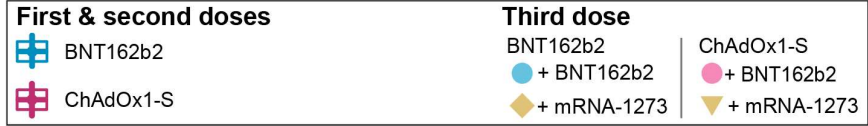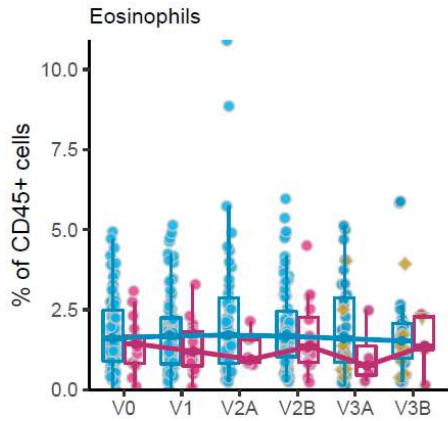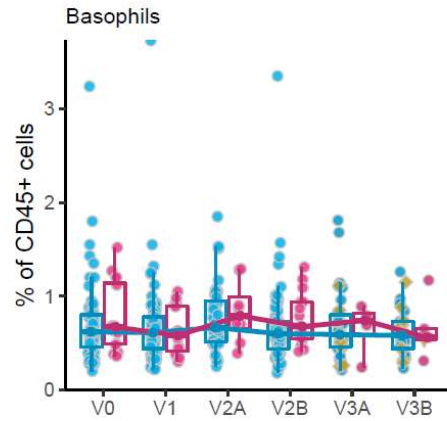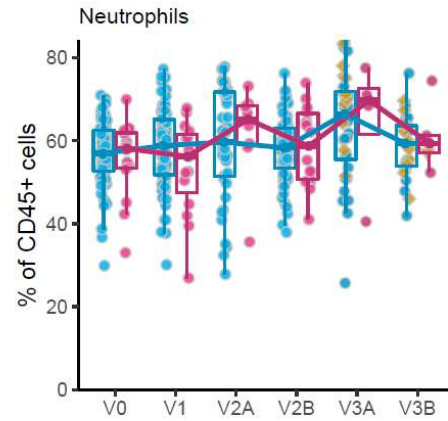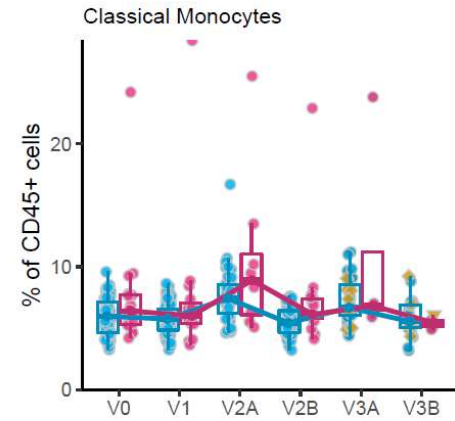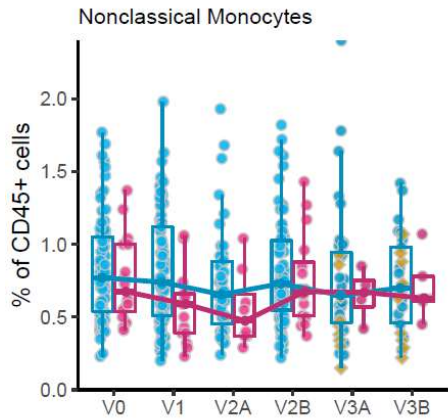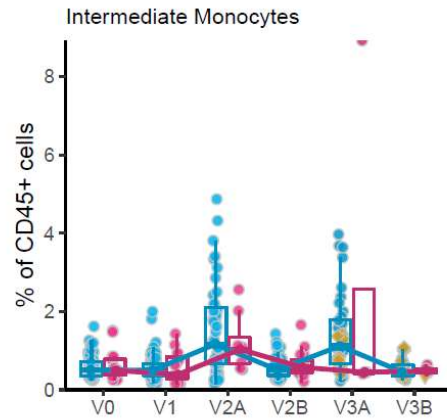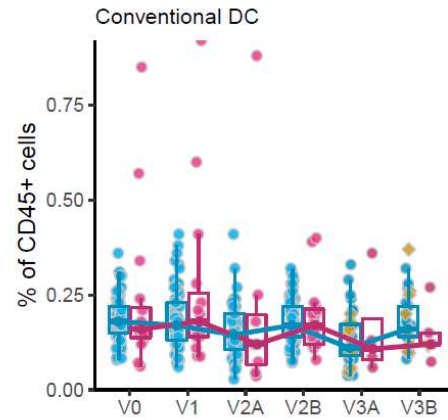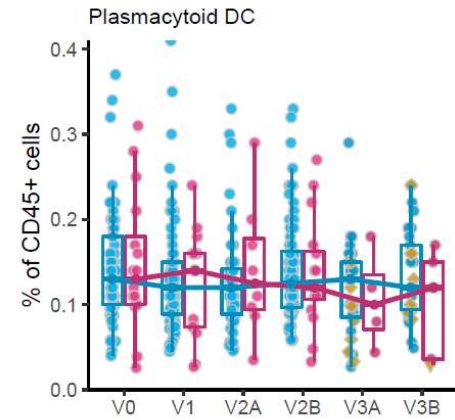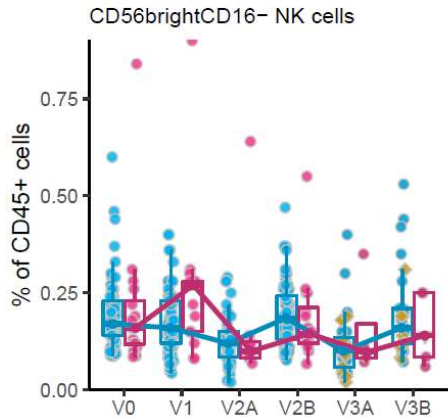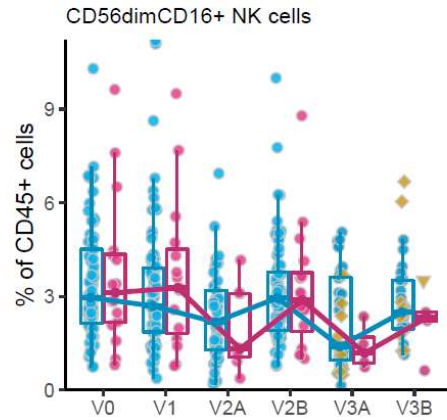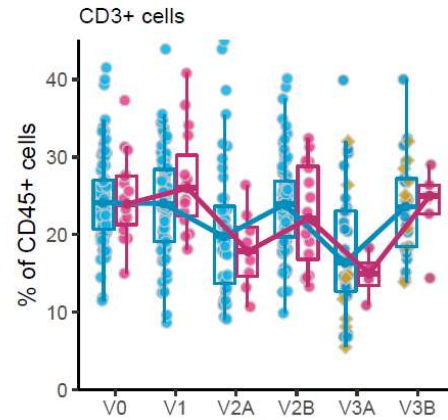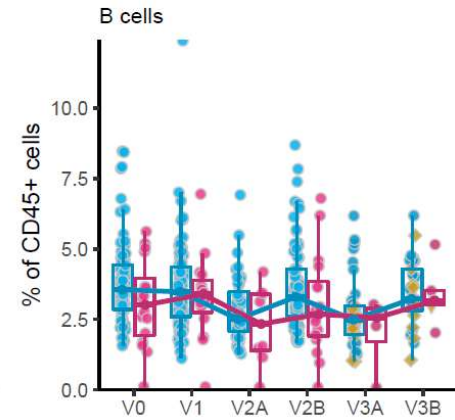

# Immune cell (% of parent)

**First & second doses**

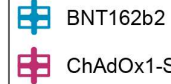

**Third dose**

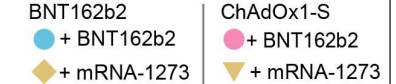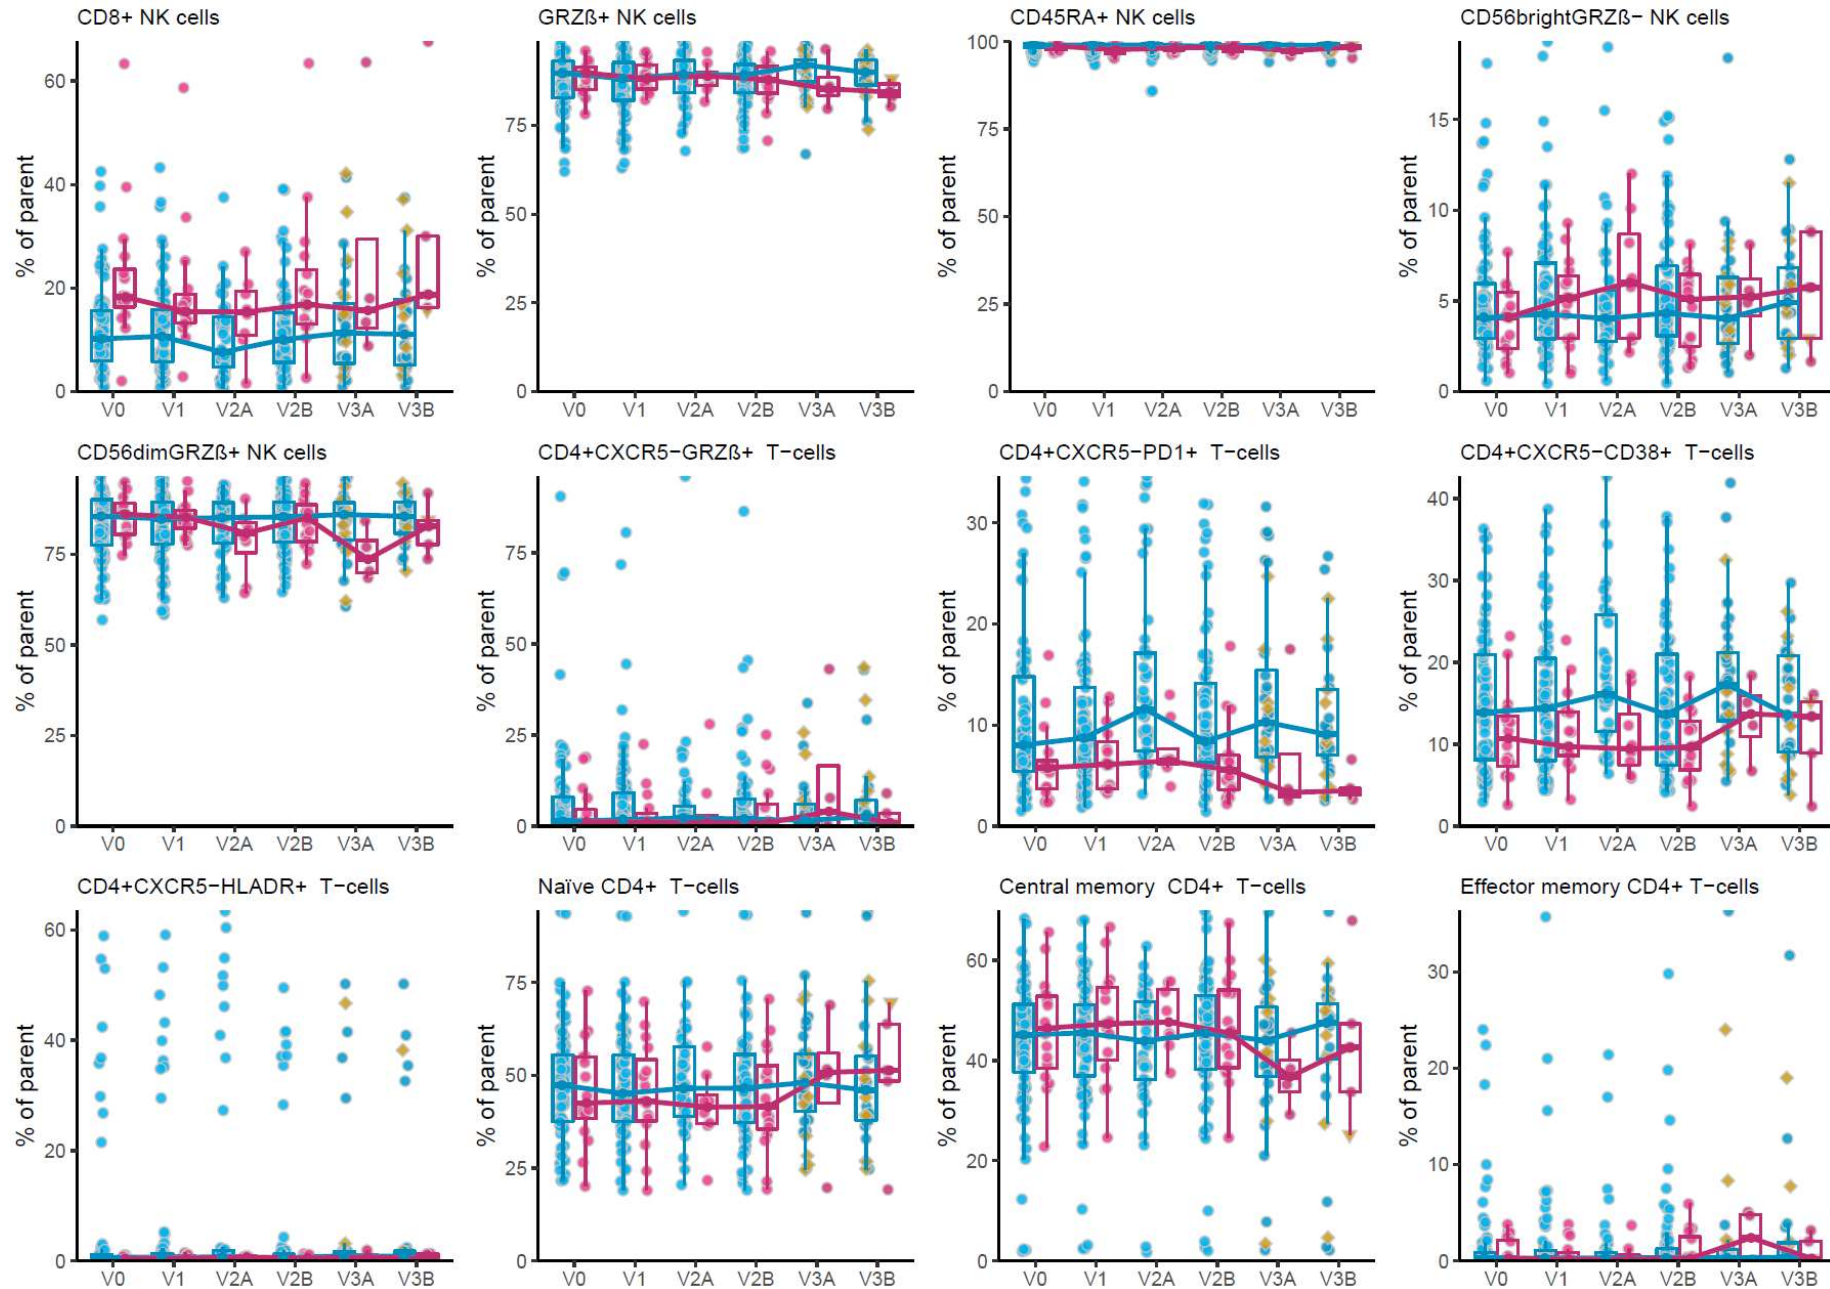



# Myeloid Activation – CD86

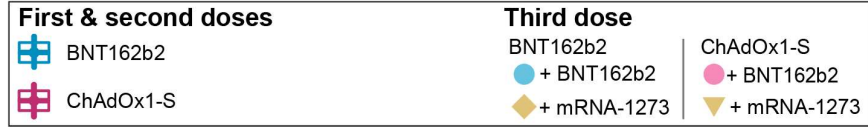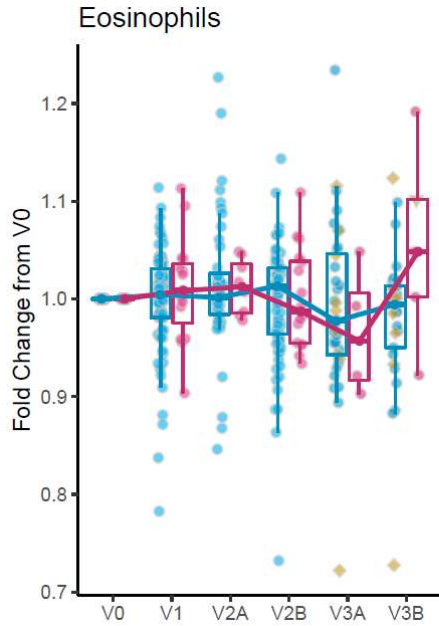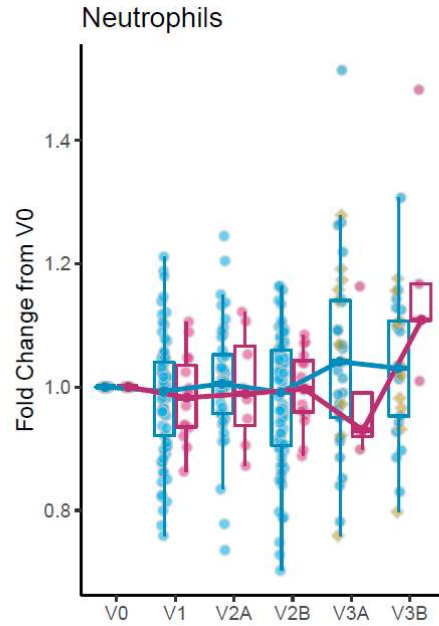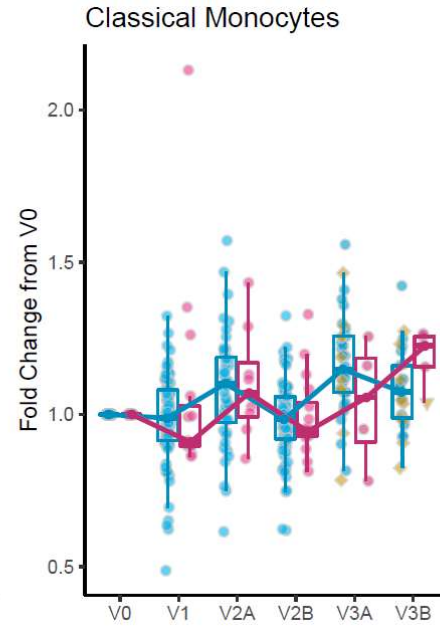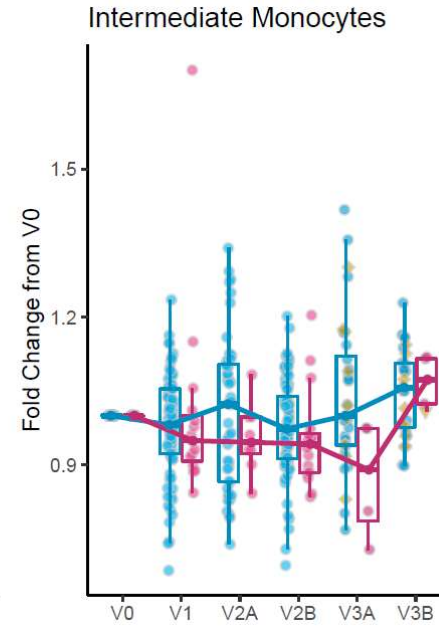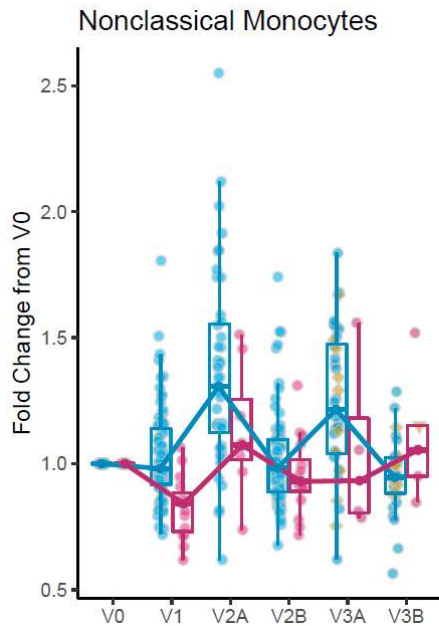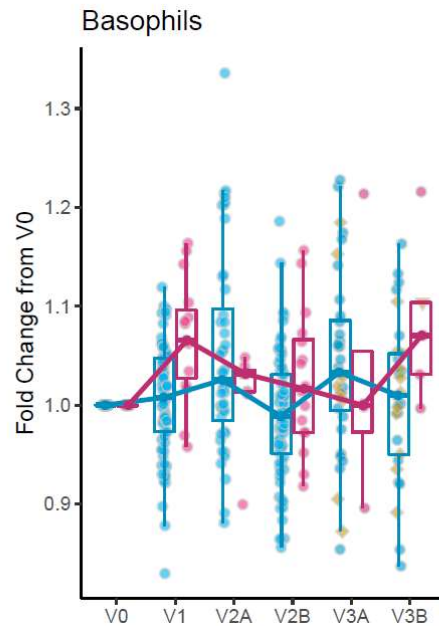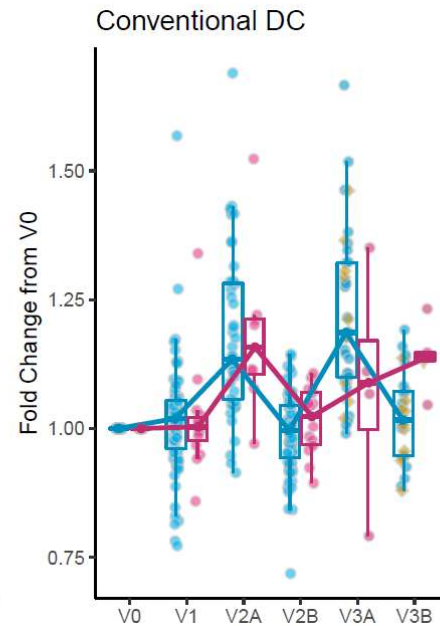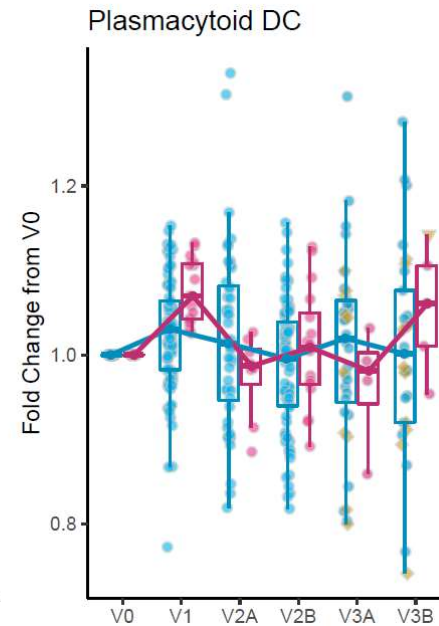

# Myeloid Activation – HLA-DR

## First & second doses

- BNT162b2
- ChAdOx1-S

## Third dose

- BNT162b2
- + BNT162b2
- ◆ + mRNA-1273
- ▼ ChAdOx1-S
- ▼ + BNT162b2
- ▼ + mRNA-1273

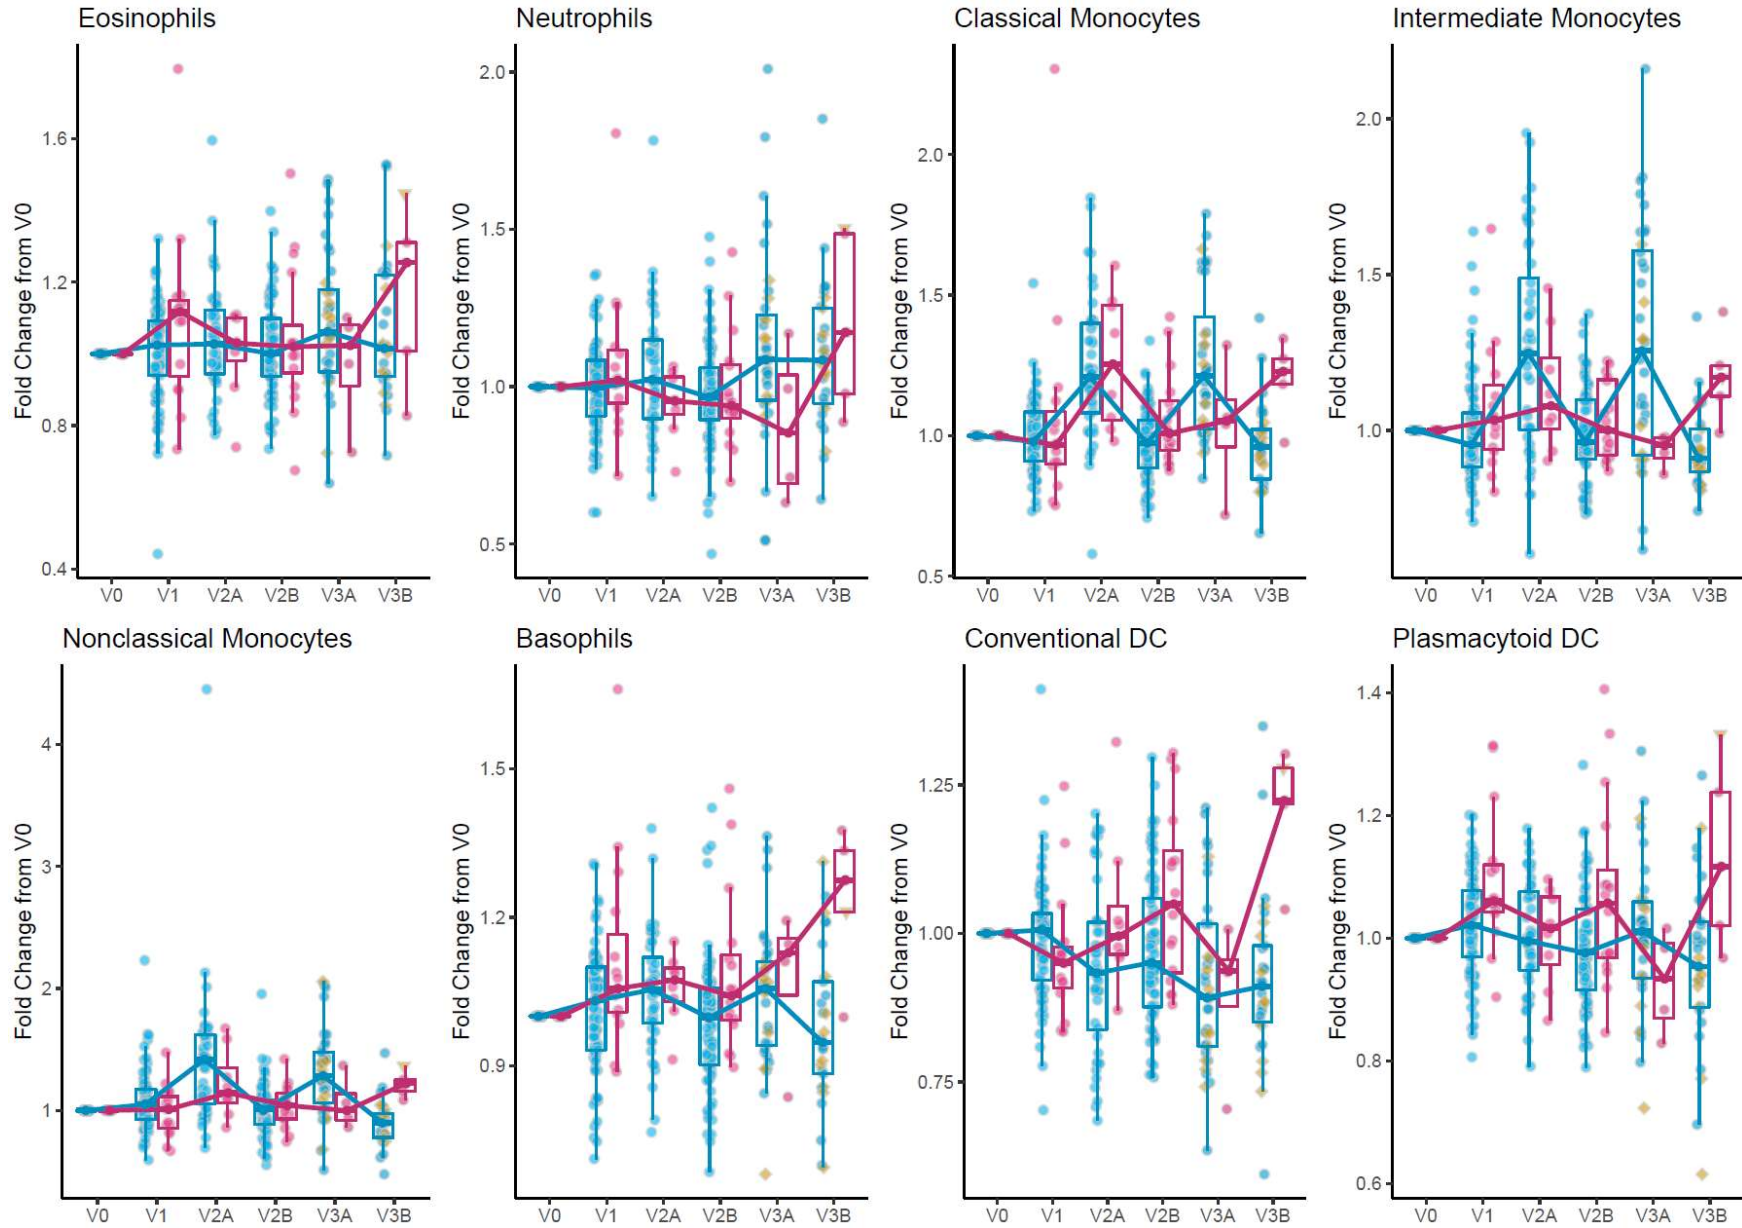



# Immune cell frequency

## First & second doses

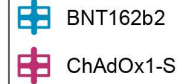

## Third dose

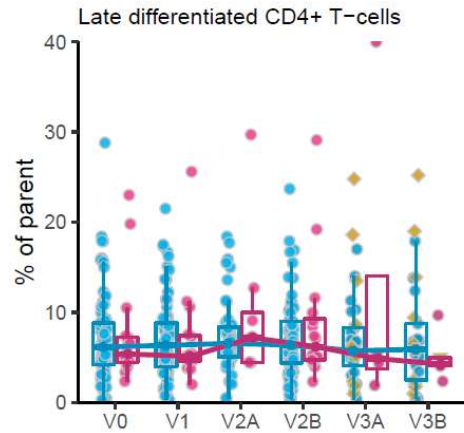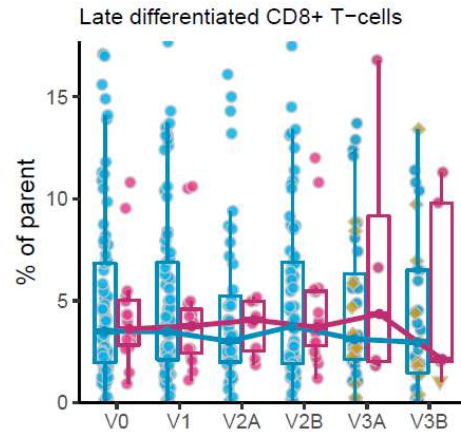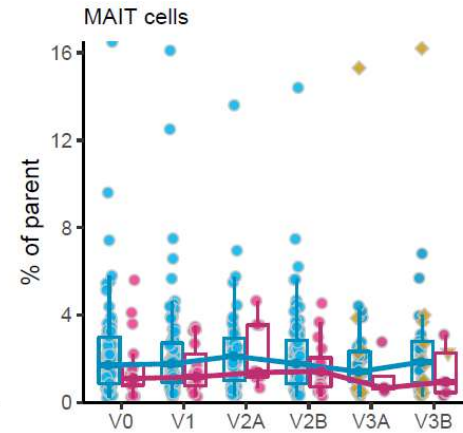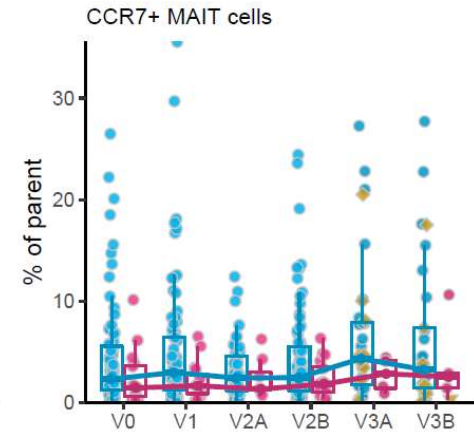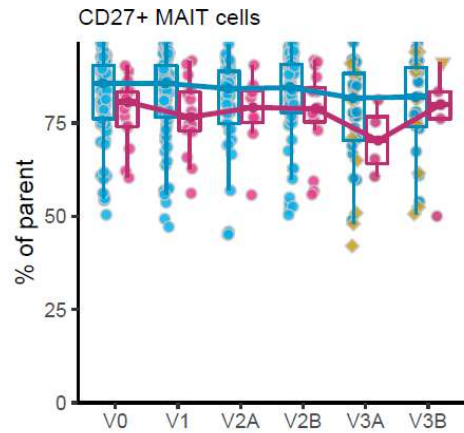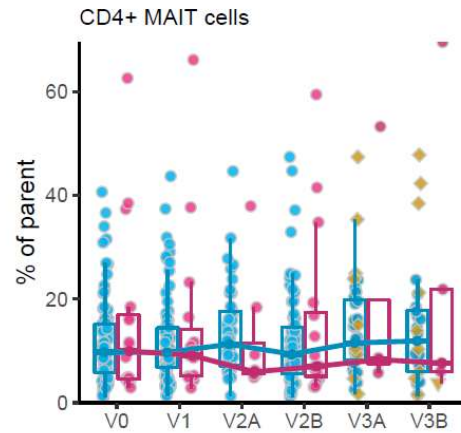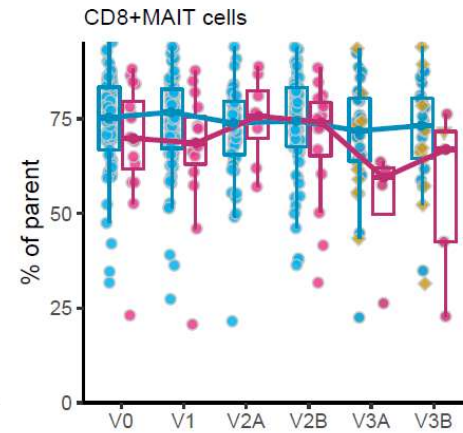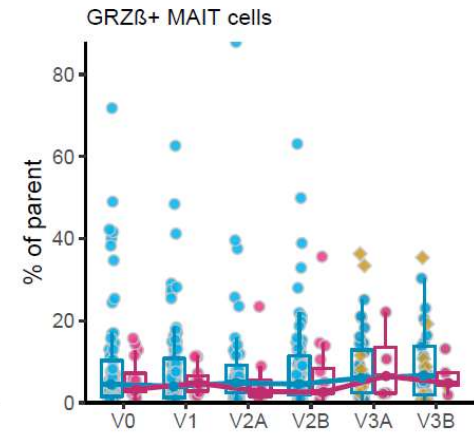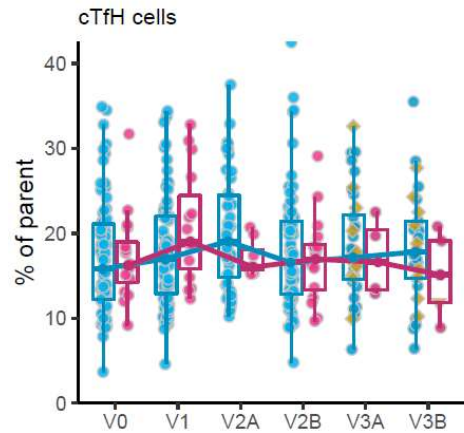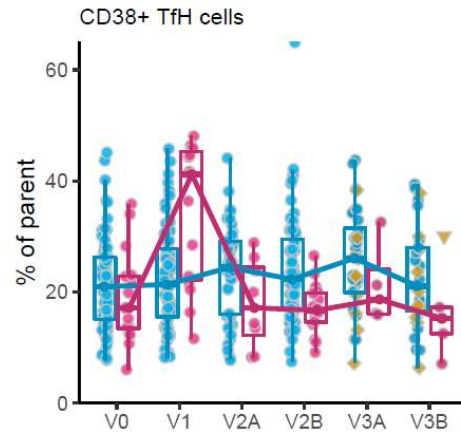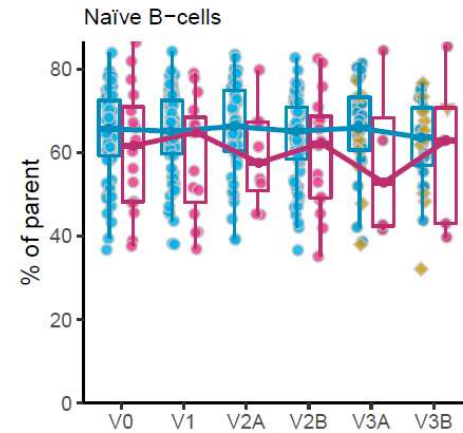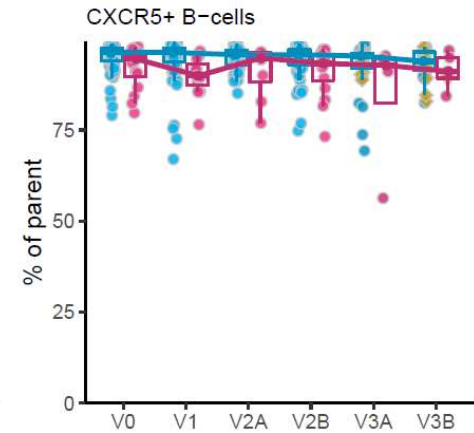

Supplement: Supplementary file [file media-9.pdf]
