# Supplementary material for: A systems immunology study comparing innate and adaptive immune responses in adults to COVID-19 mRNA (BNT162b2/mRNA-1273) and adenovirus vectored vaccines (ChAdOx1-S) after the first, second and third doses
Source: bioRxiv or medRxiv preprint supplement (doi:10.1101/2022.09.22.22280180), 2022-09-23
Supplement: Supplementary file [file media-8.pdf]

**AIM assay gating:**

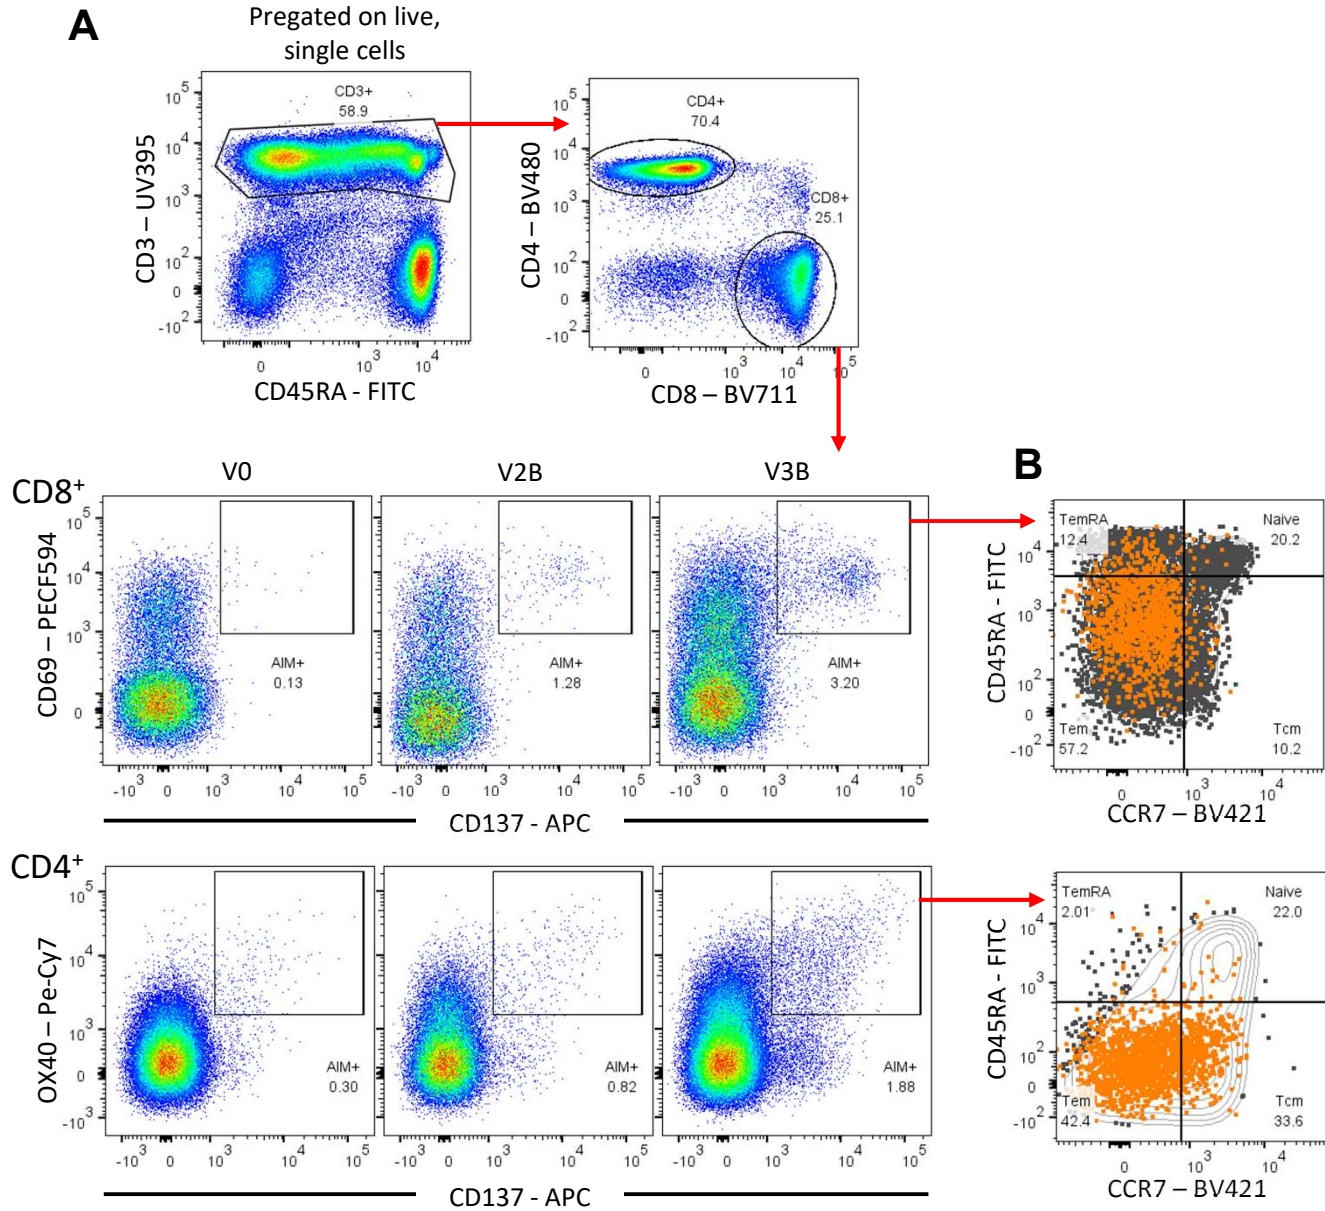

Representative flow cytometry for the identification of activation-induced marker expression on CD4<sup>+</sup> and CD8<sup>+</sup> T cells.

**A)** Representative strategy to define CD3<sup>+</sup>CD4<sup>+</sup> and CD3<sup>+</sup>CD8<sup>+</sup> cells and expression of the activation-induced markers CD69 and CD137 on CD8<sup>+</sup> T cells and OX40 and CD137 on CD4 T cells at V0, V2B and V3B. **B)** AIM<sup>+</sup> memory subsets (orange) were defined based on the expression of CCR7 and CD45RA: central memory (TCM, CCR7+CD45RA<sup>-</sup>), effector memory (TEM, CCR7-CD45RA<sup>-</sup>), and terminally differentiated effector cells (TEMRA, CCR7-CD45RA<sup>+</sup>) overlaid on total CD4 and CD8 T cell subsets.

# Panel 1: Pan Leukocyte gating

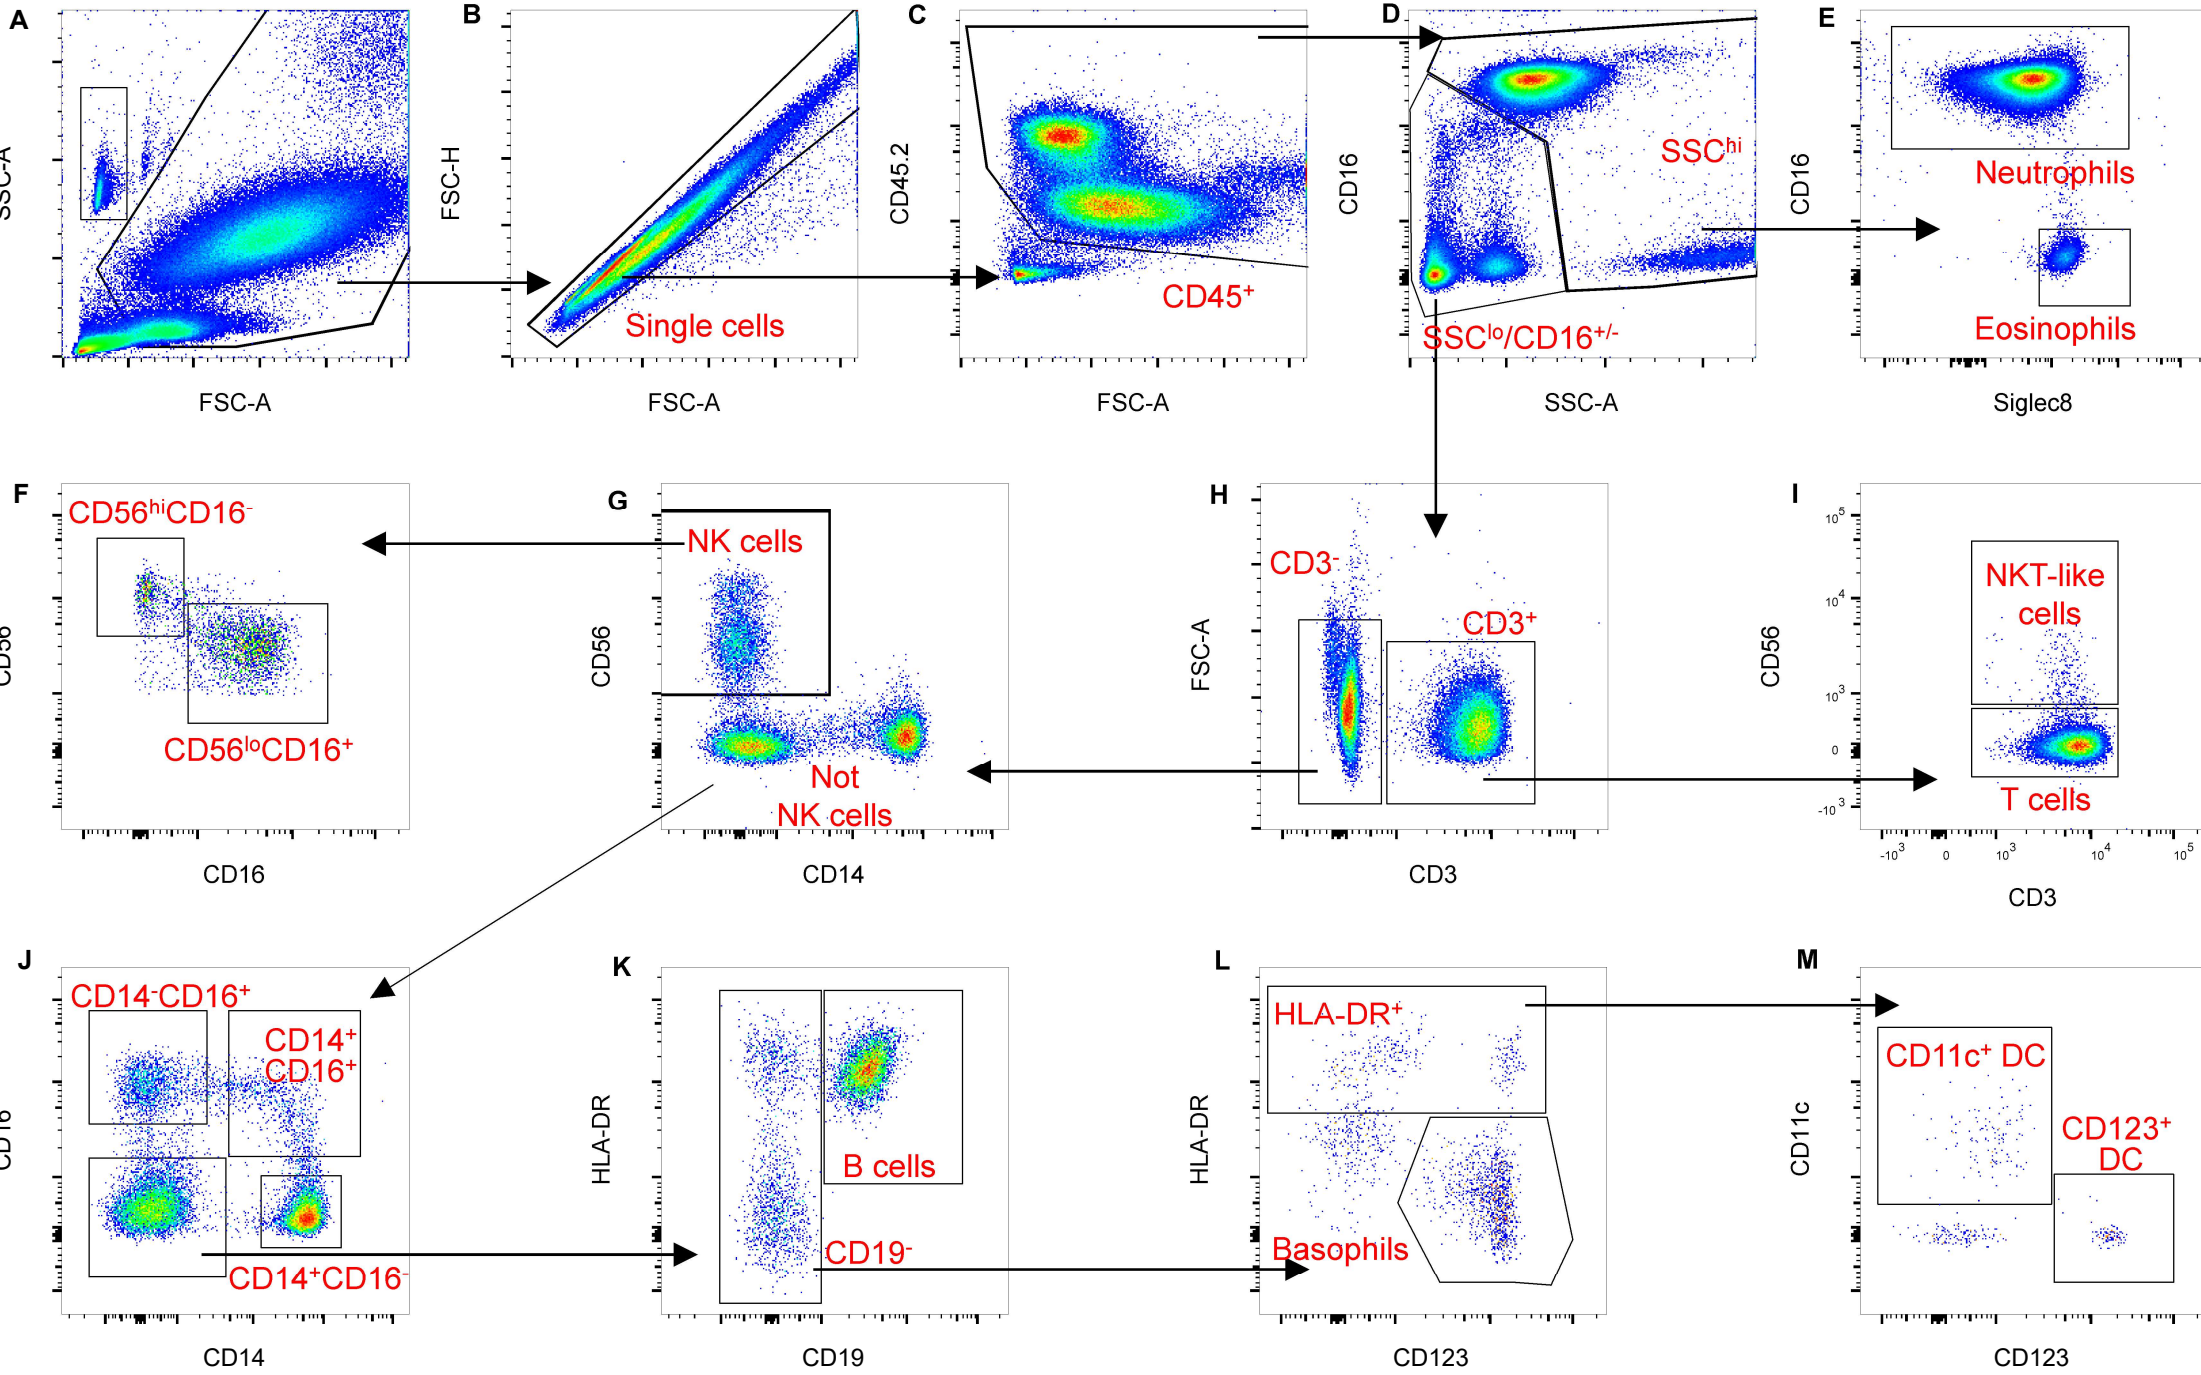

## Panel 1 gating strategy.

- A)** Leukocytes identified based on FSC and SSC. Count beads also identified by high SSC and low SSC, and counted based on uniform fluorescence into Blue 530/30 and Yellow Green 780/60 channels.
- B)** Doublets eliminated based on FSC and FSH.
- C)** Identification of CD45<sup>+</sup> leukocytes within single cell population.
- D)** Separation of CD45<sup>+</sup> cells into CD16<sup>+/-</sup>, high SSC (granulocyte) and CD16<sup>+/-</sup> low SSC (lymphocyte and monocyte) populations.
- E)** Identification of neutrophils (CD16<sup>+</sup>) and eosinophils (Siglec8<sup>+</sup>CD16<sup>-</sup>) within the CD16<sup>+/-</sup>, high SSC population.
- F)** Identification of CD56<sup>high</sup>CD16<sup>-</sup> and CD56<sup>low</sup>CD16<sup>+</sup> natural killer (NK; CD3<sup>-</sup>CD56<sup>+</sup>) cell populations.
- G)** Identification of NK cells (CD56<sup>+</sup>) within the CD3<sup>-</sup>, CD16<sup>+/-</sup> low SSC population.
- H)** Identification of T-cells (CD3<sup>+</sup>) within CD16<sup>+/-</sup> low SSC population.
- I)** Identification of natural killer T (NKT) like cells (CD3<sup>+</sup>CD56<sup>+</sup>) and conventional T cells (CD3<sup>+</sup>CD56<sup>-</sup>) within the CD3<sup>+</sup>, CD16<sup>+/-</sup> low SSC population.
- J)** Identification of classical monocytes (CD14<sup>+</sup>CD16<sup>-</sup>), intermediate monocytes (CD14<sup>+</sup>CD16<sup>+</sup>), and non-classical monocytes (CD14<sup>-</sup>CD16<sup>+</sup>) cells within the CD3<sup>-</sup>, CD56<sup>-</sup>, low SSC population.
- K)** Identification of B-cells (CD19<sup>+</sup>HLA-DR<sup>+</sup>) cells within CD14<sup>-</sup>,CD16<sup>-</sup>, CD3<sup>-</sup>, CD56<sup>-</sup>, low SSC population.
- L)** Identification of dendritic cells (DC; HLA-DR<sup>+</sup>, CD123<sup>+/-</sup>) and basophils (CD123<sup>+</sup>HLA-DR<sup>-</sup>) within the CD19<sup>-</sup>, CD14<sup>-</sup>,CD16<sup>-</sup>, CD3<sup>-</sup>, CD56<sup>-</sup>, low SSC population.
- M)** Identification of conventional DCs (CD11c<sup>+</sup>) and plasmacytoid DCs (CD123<sup>+</sup>) within the dendritic cell population.

# Panel 2: lymphocyte gating

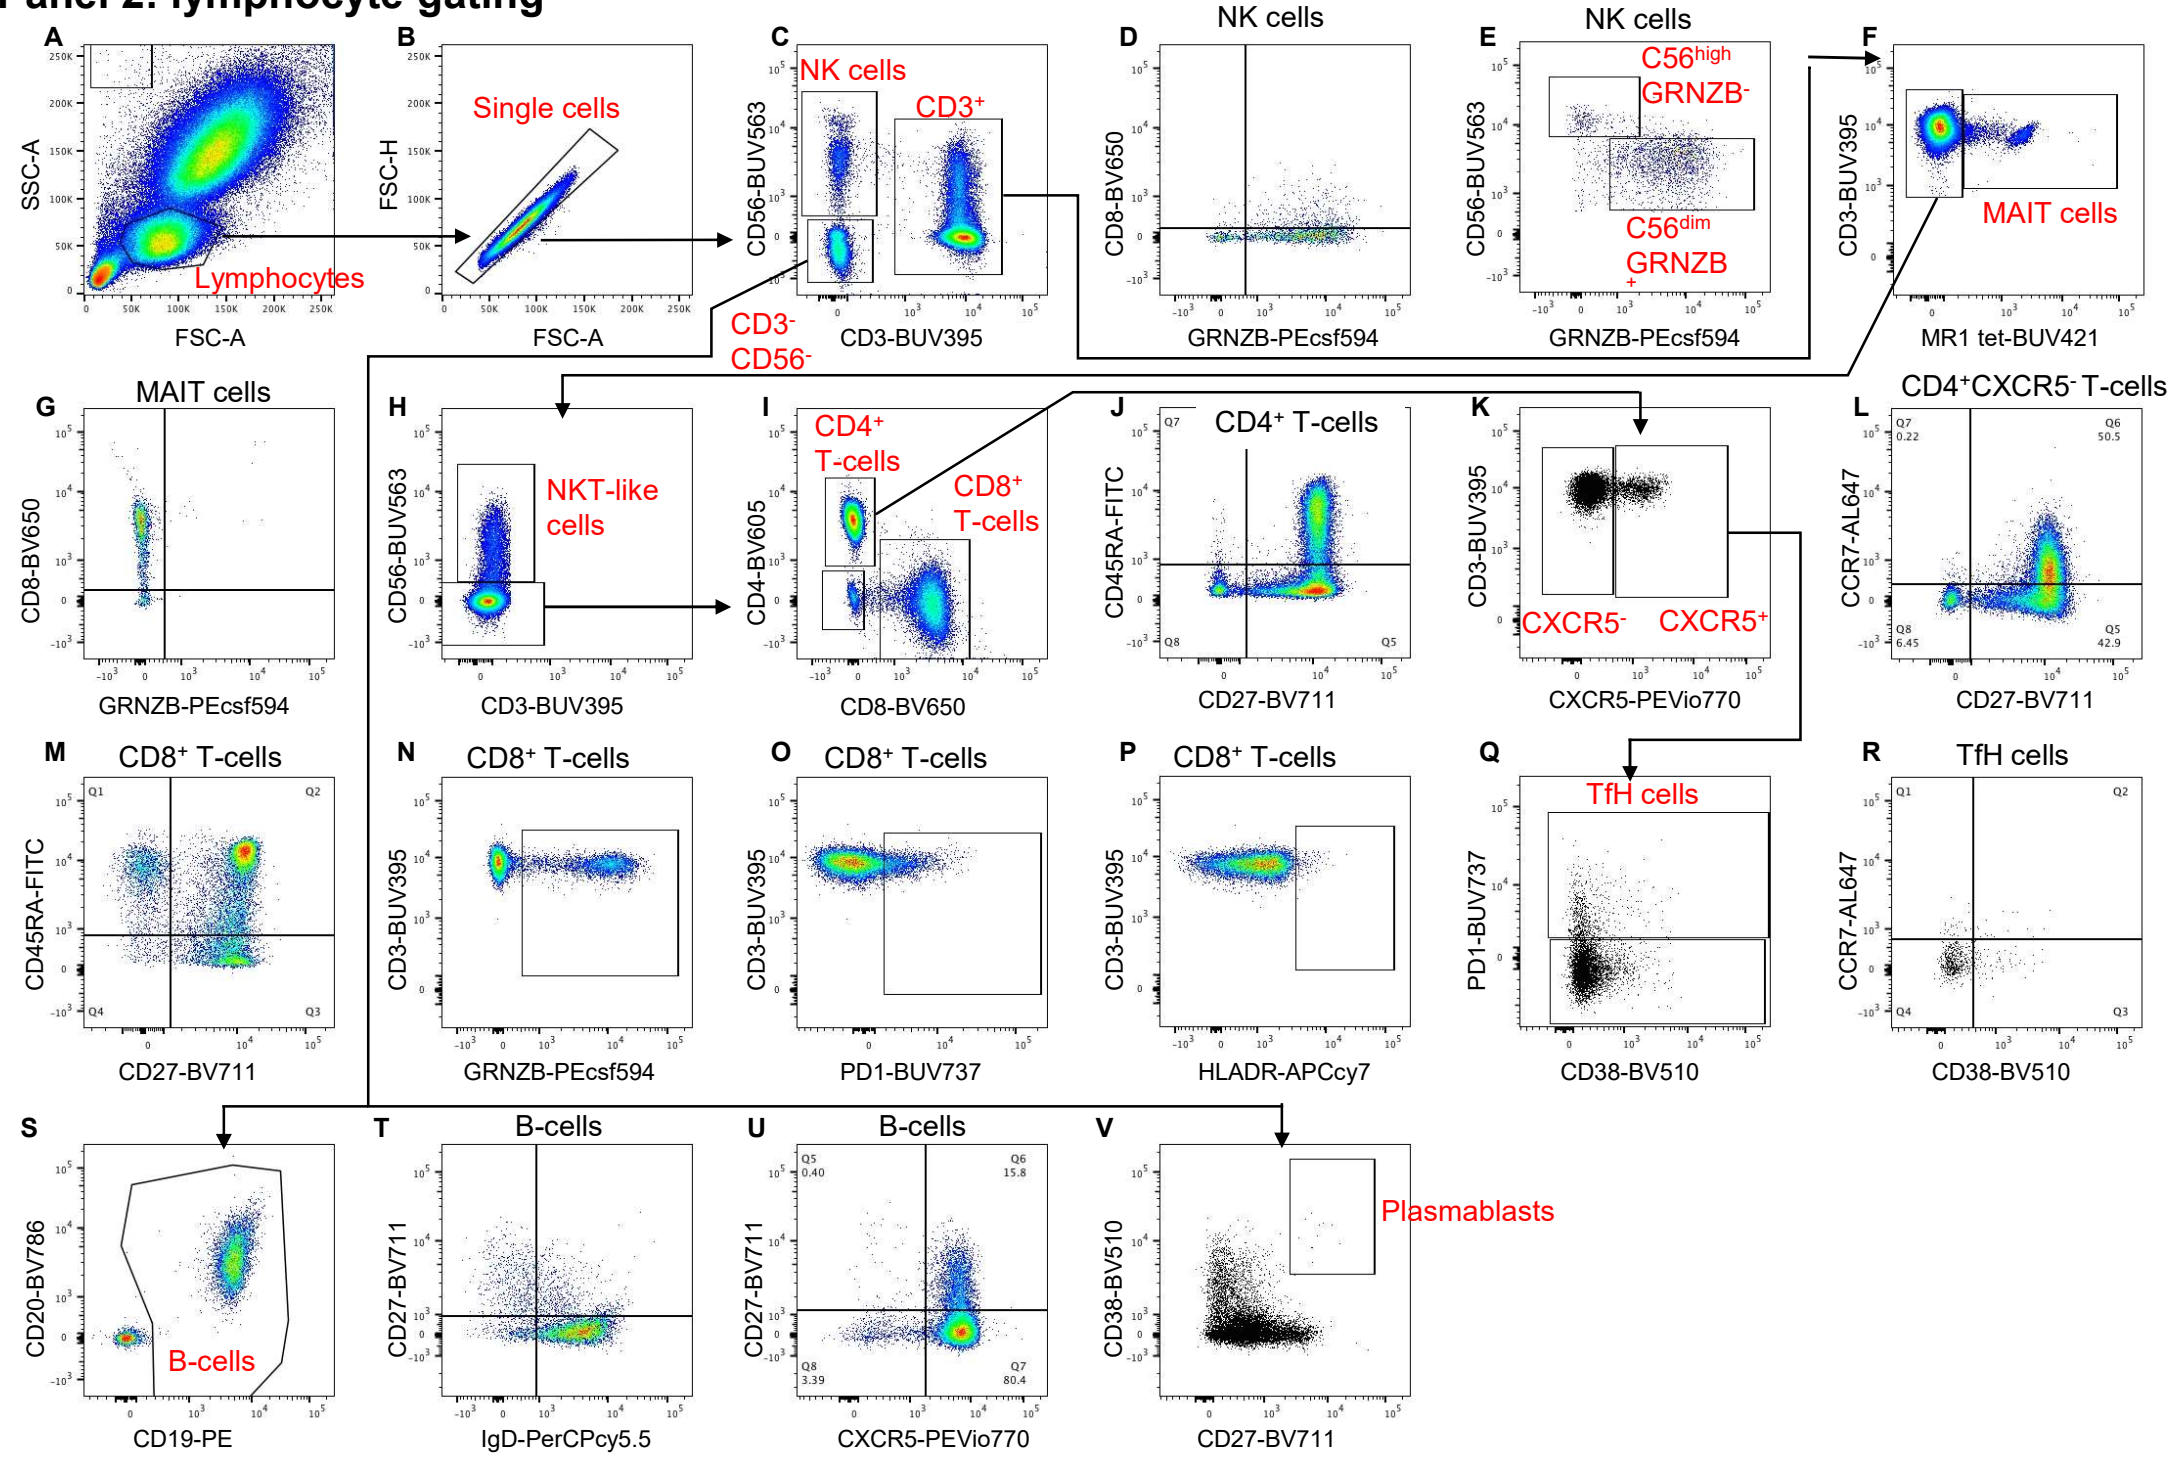

## Panel 2 gating strategy.

- A)** Lymphocytes identified based on FSC and SSC. Count beads also identified by high SSC and low SSC, and counted based on uniform fluorescence into Blue 530/30 and Yellow Green 780/60 channels.
- B)** Doublets eliminated based on FSC and FSH.
- C)** Identification of natural killer (NK) cells (CD56<sup>+</sup>CD3<sup>-</sup>), T cells (CD3<sup>+</sup>CD56<sup>+/-</sup>) and CD3<sup>-</sup>CD56<sup>-</sup> lymphocytes.
- D)** Expression of granzyme B and CD8 on NK cells.
- E)** Identification of CD56<sup>high</sup>GRN<sup>ZB</sup><sup>-</sup> and CD56<sup>low</sup>GRN<sup>ZB</sup><sup>+</sup> NK cell populations.
- F)** Identification of mucosal-associated invariant T-cells (MAIT) cells (CD3<sup>+</sup>MR1-tetramer<sup>+</sup>) from CD3<sup>+</sup>CD56<sup>+/-</sup> population.
- G)** Expression of granzyme B and CD8 on MAIT cells.
- H)** Identification of natural killer (NKT)-like cells from CD3<sup>+</sup>CD56<sup>+/-</sup>MR1-tet<sup>-</sup> population.
- I)** Identification of conventional CD4<sup>+</sup> and CD8<sup>+</sup> T-cells from CD3<sup>+</sup>MR1-tet<sup>-</sup>CD56<sup>-</sup> population.
- J)** Identification of naïve (CD45RA<sup>+</sup>CD27<sup>+</sup>), central memory (CD45RA<sup>-</sup>CD27<sup>+</sup>), effector memory (CD45RA<sup>+</sup>CD27<sup>-</sup>) and late differentiated (CD45RA<sup>-</sup>CD27<sup>-</sup>) cells within the CD4<sup>+</sup> Conventional T-cell population.
- K)** Identification of CXCR5<sup>+</sup> and CXCR5<sup>-</sup> cells within the CD4<sup>+</sup> Conventional T-cell population.
- L)** Expression of CCR7 and CD27 within the CXCR5-CD4<sup>+</sup> Conventional T-cell population.
- M)** Identification of naïve (CD45RA<sup>+</sup>CD27<sup>+</sup>), central memory (CD45RA<sup>-</sup>CD27<sup>+</sup>), effector memory (CD45RA<sup>+</sup>CD27<sup>-</sup>) and late differentiated (CD45RA<sup>-</sup>CD27<sup>-</sup>) cells within the CD8<sup>+</sup> Conventional T-cell population.
- N)** Expression of granzyme B within the CD8<sup>+</sup> Conventional T-cell population.
- O)** Expression of PD1 within the CD8<sup>+</sup> Conventional T-cell population.
- P)** Expression of HLA-DR within the CD8<sup>+</sup> Conventional T-cell population.
- Q)** Identification of circulating T follicular helper (cTfH) cells by PD1 expression on CXCR5<sup>+</sup>CD4<sup>+</sup> Conventional T-cells.
- R)** Identification of CCR7-CD38<sup>+</sup> and CCR7-CD38<sup>-</sup> populations within cTfH cells.
- S)** Identification of B-cells (CD19<sup>+</sup>CD20<sup>+/-</sup>) within CD3<sup>-</sup>CD56<sup>-</sup> lymphocyte population.
- T)** Identification of naïve (CD27-IgD<sup>+</sup>), IgD<sup>+</sup> memory (CD27<sup>+</sup>IgD<sup>+</sup>) and IgD<sup>-</sup> memory (CD27<sup>+</sup>IgD<sup>-</sup>) B-cells.
- U)** Expression of CD27 and CXCR5 within the B-cell gate.
- V)** Identification of plasmablasts (CD19<sup>+/-</sup>, CD20<sup>-</sup>, CD27<sup>++</sup>CD38<sup>++</sup>) within the CD3<sup>-</sup>CD56<sup>-</sup> population.
